# Supplementary material
Source: PubMed Central journal article supplement (PMC7497667)
Supplement: mp0c00523_si_001.pdf [file mp0c00523_si_001.pdf]

**SUPPORTING INFORMATION**

Metabolism of a Bioorthogonal PET Tracer Candidate  
[<sup>19</sup>F/<sup>18</sup>F]SiFA-Tetrazine in Mouse Liver Microsomes:  
Biotransformation Pathways and Defluorination  
Investigated by UHPLC-HRMS

*Sofia Otaru<sup>†\*</sup>, Hanna Niemikoski<sup>‡</sup>, Mirikka Sarparanta<sup>†</sup>, Anu J. Airaksinen<sup>†,§\*</sup>*

<sup>†</sup>Radiochemistry, Department of Chemistry, University of Helsinki, Finland

<sup>‡</sup>Finnish Institute for Verification of the Chemical Weapons Convention (VERIFIN), Department of Chemistry, University of Helsinki, Finland

<sup>§</sup>Turku PET Centre, Department of Chemistry, University of Turku, 20500 Turku, Finland

\*Corresponding author: Sofia Otaru and Anu Airaksinen

Radiochemistry, Department of Chemistry P.O. Box 55, FI-00014 University of Helsinki, Finland. E-mail: [sofia.otaru@helsinki.fi](mailto:sofia.otaru@helsinki.fi), [anu.airaksinen@helsinki.fi](mailto:anu.airaksinen@helsinki.fi)

Keywords: *defluorination; metabolism; positron emission tomography; silicon fluoride acceptor; tetrazine; geometric isomers*

## Table of contents

| Contents                                                                                                                                                                                                          | Page |
|-------------------------------------------------------------------------------------------------------------------------------------------------------------------------------------------------------------------|------|
| <b>Figure S1.</b> Biodistribution of [ <sup>18</sup> F]SiFA-Tz and <i>in vivo</i> defluorination                                                                                                                  | S3   |
| <b>Table S1.</b> Conditions used for generating <i>in vitro</i> metabolites in MLMs                                                                                                                               | S4   |
| <b>Figure S2.</b> MS/HRMS spectrum, mass differences and proposed fragments of SiFA-Tz                                                                                                                            | S4   |
| <b>Figure S3.</b> MS/HRMS spectrum, mass differences and proposed fragments of SiFA-H <sub>2</sub> Tz                                                                                                             | S5   |
| <b>Figure S4.</b> Relative abundances of <i>E</i> - and <i>Z</i> -isomers of SiFA-Tz and SiFA-H <sub>2</sub> Tz in analytical standard, control and <i>in vitro</i> samples.                                      | S6   |
| <b>Figure S5.</b> Relative abundances of <i>E</i> - and <i>Z</i> -isomers of SiFA-Tz in standard sample                                                                                                           | S7   |
| <b>Table S2.</b> Elemental compositions, theoretical masses, measured masses, mass differences, proposed structures and retention times of proposed phase I metabolites of SiFA-Tz                                | S8   |
| <b>Table S3.</b> Elemental compositions, theoretical masses, measured masses, mass differences, proposed structures and retention times of proposed phase I metabolites of SiFA-H <sub>2</sub> Tz                 | S8   |
| <b>Figure S6.</b> MS/HRMS spectrum and proposed fragments of phase I and phase II metabolites of SiFA-H <sub>2</sub> Tz                                                                                           | S9   |
| <b>Table S4.</b> Elemental compositions, theoretical masses, measured masses, mass differences, proposed structures and retention times of proposed phase II metabolites of SiFA-Tz                               | S10  |
| <b>Table S5.</b> Elemental compositions, theoretical masses, measured masses, mass differences, proposed structures and retention times of proposed phase II metabolites of SiFA-H <sub>2</sub> Tz                | S10  |
| <b>Figure S7.</b> Formation of <i>o</i> -glucuronide conjugate metabolites M6 and M8 in MLMs.                                                                                                                     | S11  |
| <b>Figure S8.</b> Formation of proposed <i>o</i> -glucuronide conjugate metabolites M(H <sub>2</sub> ) <sub>5</sub> and defluorinated M(H <sub>2</sub> ) <sub>7</sub> .                                           | S12  |
| <b>Table S6.</b> Theoretical masses, retention times, biotransformations and major fragments of proposed metabolites of SiFA-Tz detected in <i>in vitro</i> samples                                               | S13  |
| <b>Figure S9.</b> Fragmentation pattern for proposed metabolite M(H <sub>2</sub> ) <sub>5</sub> ( <i>m/z</i> 703) using HCD 30%                                                                                   | S14  |
| <b>Figure S10.</b> Fragments formed using MS/HRMS for proposed metabolites M(H <sub>2</sub> ) <sub>5</sub> using HCD 30%                                                                                          | S15  |
| <b>Figure S11.</b> MS/MS/HRMS (MS <sup>3</sup> ) –spectrum and fragmentation pattern of proposed metabolite M6 of SiFA-Tz.                                                                                        | S16  |
| <b>Figure S12.</b> Extracted ion chromatograms of proposed hydroxylated and <i>o</i> -glucuronidated metabolites M(H <sub>2</sub> ) <sub>3</sub> and its defluorinated analogue M(H <sub>2</sub> ) <sub>4</sub> . | S17  |

**Biodistribution of [<sup>18</sup>F]SiFA-Tz and *in vivo* defluorination.**

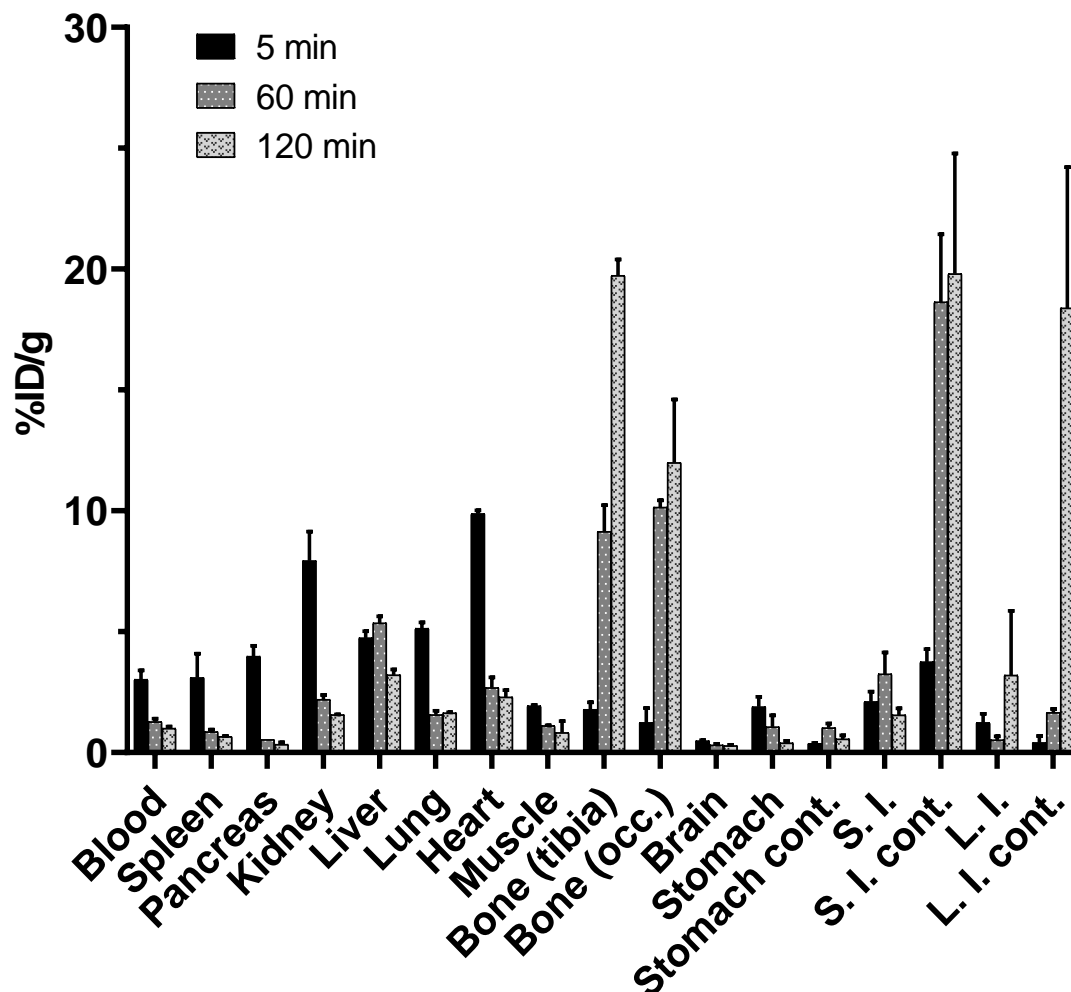

**Figure S1.** The biodistribution of [<sup>18</sup>F]SiFA-Tz (*t* = 5, 60 and 120 min., *n* = 2) in healthy CD-1 mice demonstrated rapid clearance from the blood stream, but a rapid and high bone uptake 60 minutes post-injection, attributed presumably to fast metabolism leading to *in vivo* defluorination, was also detected (occ., occipital; S.I, small intestines; L.I, large intestines). The administered dose was  $8.8 \pm 0.3$  MBq ( $53.1 \pm 0.9$  nmol, *n* = 6) of [<sup>18</sup>F]SiFA-Tz.

**Table S1.** Conditions used for generating *in vitro* metabolites in MLMs.

| Sample    | SiFA-Tz | NADPH | UDPGA | MLM | Alamethicin | *Buffer | Time (min)      |
|-----------|---------|-------|-------|-----|-------------|---------|-----------------|
| Phase I   | ✓       | ✓     |       | ✓   |             | ✓       | 5, 60, 120, 240 |
| Phase II  | ✓       | ✓     | ✓     | ✓   | ✓           | ✓       | 5, 60, 120, 240 |
| Control 1 | ✓       | ✓     | ✓     | ✓   | ✓           | ✓       | 0               |
| Control 2 |         | ✓     |       | ✓   | ✓           | ✓       | 0               |
| Control 3 | ✓       |       | ✓     | ✓   | ✓           | ✓       | 5, 60, 120, 240 |
| Control 4 | ✓       | ✓     | ✓     |     | ✓           | ✓       | 5, 60, 120, 240 |

\*Buffer = 100 mM Potassium phosphate solution pH 7.4.

**MS/HRMS spectrum, mass differences and proposed fragments of SiFA-Tz.**

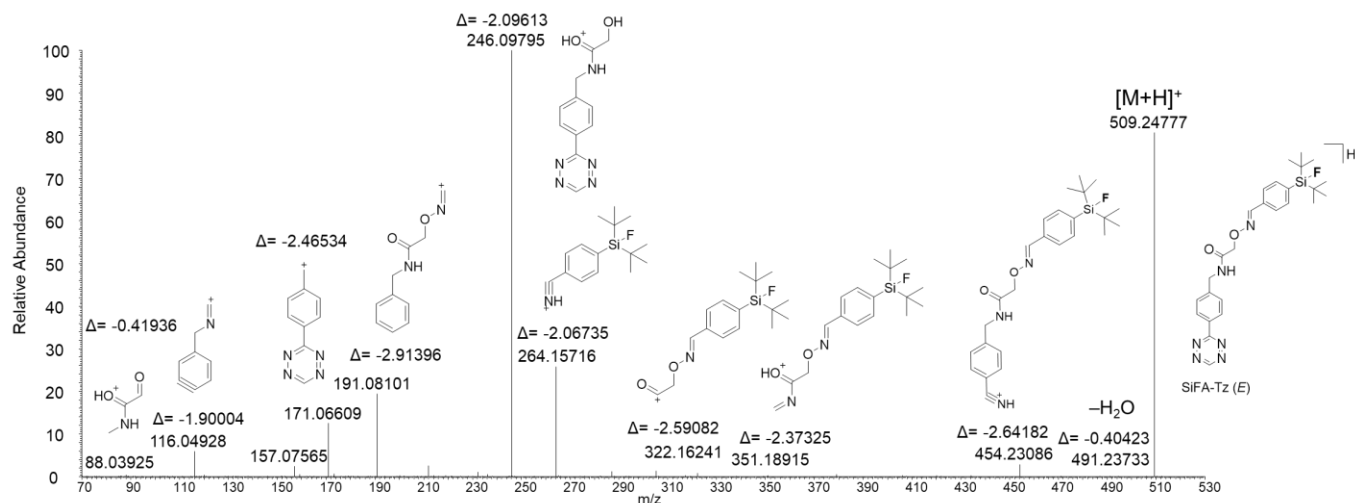

**Figure S2.** The MS/HRMS-spectrum and proposed fragmentation pattern of **1** (*E*-isomer) with assigned proposed possible fragments using HCD 30% ( $\Delta$ ; mass difference in ppm).

### MS/HRMS spectrum, mass differences and proposed fragments of SiFA-H<sub>2</sub>Tz.

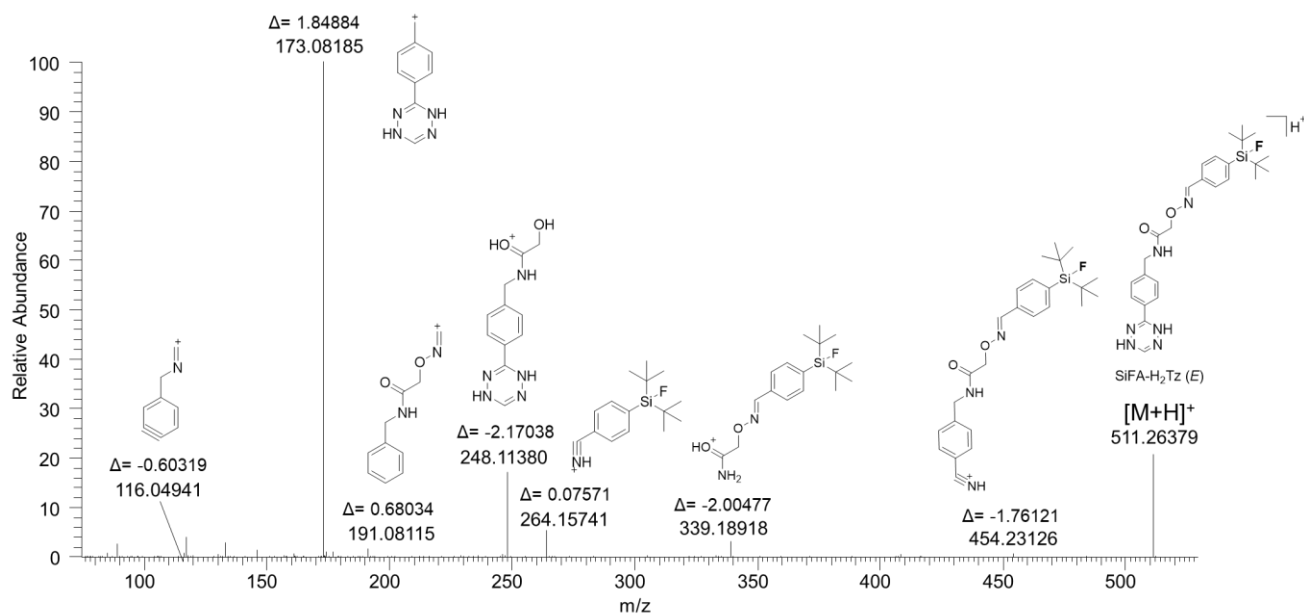

**Figure S3.** The MS/HRMS-spectrum and proposed fragmentation pattern of (*E*)-SiFA-H<sub>2</sub>Tz with assigned proposed fragments using HCD 25%. Diagnostic fragments at *m/z* 173 and at *m/z* 248 indicate reduction of the tetrazine ring ( $\Delta$ ; mass difference in ppm).

Relative abundances of *E*- and *Z*-isomers of SiFA-Tz and SiFA-H<sub>2</sub>Tz in analytical standard, control and *in vitro* samples.

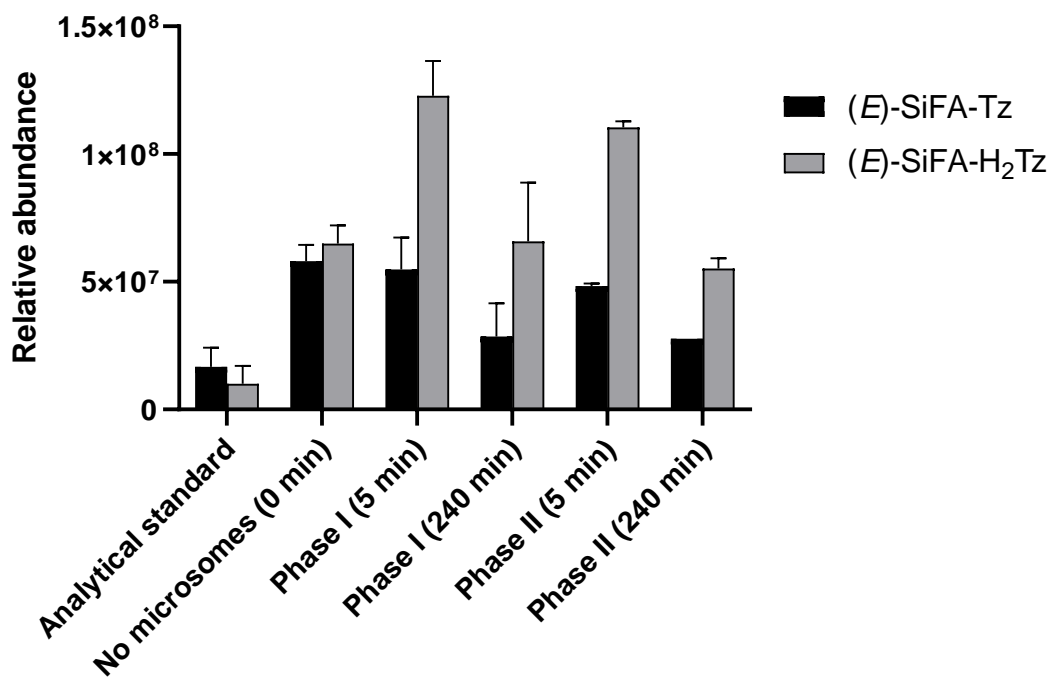

Figure S4. Relative abundances of *E*- and *Z*-isomers of SiFA-Tz and SiFA-H<sub>2</sub>Tz in analytical standard, control and *in vitro* samples.

Relative abundances of *E*- and *Z*-isomers of SiFA-Tz in standard sample.

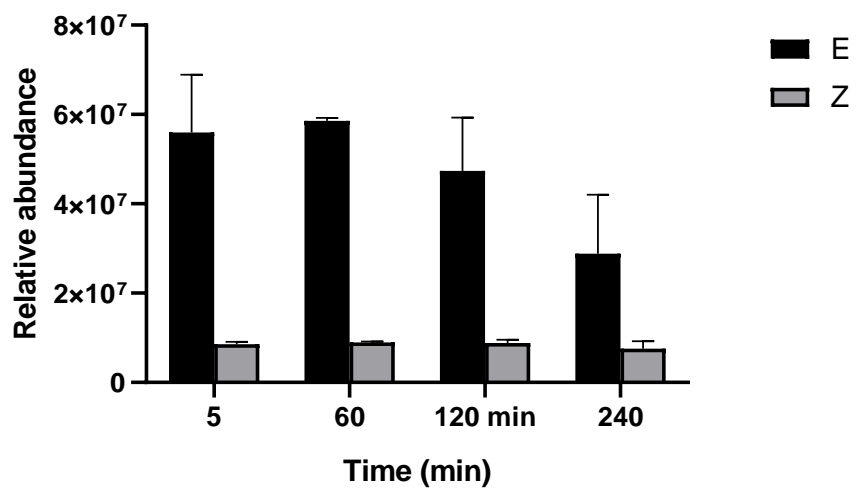

Figure S5. Difference in metabolism speed of isomers.

**Table S2.** Elemental compositions, theoretical masses, measured masses, mass differences, proposed structures and retention times of proposed phase I metabolites of SiFA–Tz.

| Compd.  | Formula [M + H] <sup>+</sup>                                                   | Theoretical mass ( <i>m/z</i> ) | Observed mass ( <i>m/z</i> )                     | Mass difference (ppm)                         | Proposed structure                                                                                             | <i>T<sub>R</sub></i> (min) |
|---------|--------------------------------------------------------------------------------|---------------------------------|--------------------------------------------------|-----------------------------------------------|----------------------------------------------------------------------------------------------------------------|----------------------------|
| SiFA–Tz | C <sub>26</sub> H <sub>34</sub> FN <sub>6</sub> O <sub>2</sub> Si <sup>+</sup> | 509.24911                       | 509.24905 ( <i>E</i> )<br>509.24900 ( <i>Z</i> ) | 0.01860 ( <i>E</i> )<br>-0.20865 ( <i>Z</i> ) | 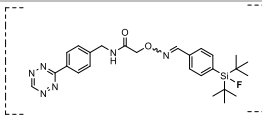 H <sup>+</sup>              | 4.64<br>4.37               |
| M1      | C <sub>26</sub> H <sub>34</sub> FN <sub>6</sub> O <sub>3</sub> Si <sup>+</sup> | 525.24402                       | 525.24329 ( <i>E</i> )                           | -1.39742                                      |  H <sup>+</sup><br>[+OH]     | 3.68                       |
| M2      | C <sub>26</sub> H <sub>34</sub> FN <sub>6</sub> O <sub>3</sub> Si <sup>+</sup> | 525.24402                       | 525.24323                                        | -1.51363                                      |  H <sup>+</sup><br>[+OH]     | 3.64                       |
| M3      | C <sub>26</sub> H <sub>35</sub> N <sub>6</sub> O <sub>4</sub> Si <sup>+</sup>  | 523.24836                       | 523.24753                                        | -1.57599                                      |  H <sup>+</sup><br>[+OH]     | 2.58                       |
| M4      | C <sub>26</sub> H <sub>35</sub> N <sub>6</sub> O <sub>5</sub> Si <sup>+</sup>  | 539.24327                       | 539.24237                                        | -1.67413                                      |  H <sup>+</sup><br>[+2 OH]   | 2.55                       |
| M5      | C <sub>26</sub> H <sub>35</sub> N <sub>6</sub> O <sub>5</sub> Si <sup>+</sup>  | 539.24327                       | 539.24240                                        | -1.61091                                      |  H <sup>+</sup><br>[+2 OH] | 2.27                       |

**Table S3.** Elemental compositions, theoretical masses, measured masses, mass differences, proposed structures and retention times of proposed phase I metabolites of SiFA–H<sub>2</sub>Tz.

| Compd.                 | Formula [M + H] <sup>+</sup>                                                   | Theoretical mass ( <i>m/z</i> ) | Observed mass ( <i>m/z</i> )                     | Mass difference (ppm)                        | Proposed structure                                                                                           | <i>T<sub>R</sub></i> (min) |
|------------------------|--------------------------------------------------------------------------------|---------------------------------|--------------------------------------------------|----------------------------------------------|--------------------------------------------------------------------------------------------------------------|----------------------------|
| SiFA–H <sub>2</sub> Tz | C <sub>26</sub> H <sub>36</sub> FN <sub>6</sub> O <sub>2</sub> Si <sup>+</sup> | 511.26476                       | 511.26478 ( <i>E</i> )<br>511.26478 ( <i>Z</i> ) | 0.04872 ( <i>E</i> )<br>0.04429 ( <i>Z</i> ) | 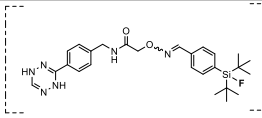 H <sup>+</sup>          | 4.37 /<br>4.24             |
| M(H <sub>2</sub> )1    | C <sub>26</sub> H <sub>36</sub> FN <sub>6</sub> O <sub>3</sub> Si <sup>+</sup> | 527.25967                       | 527.25877                                        | -1.70607                                     |  H <sup>+</sup><br>[+OH] | 3.86                       |
| M(H <sub>2</sub> )2    | C <sub>26</sub> H <sub>36</sub> FN <sub>6</sub> O <sub>3</sub> Si <sup>+</sup> | 527.25967                       | 527.25873                                        | -1.77457                                     |  H <sup>+</sup><br>[+OH] | 3.63                       |
| M(H <sub>2</sub> )3    | C <sub>26</sub> H <sub>37</sub> N <sub>6</sub> O <sub>4</sub> Si <sup>+</sup>  | 525.26401                       | 525.26303                                        | -1.85681                                     |  H <sup>+</sup><br>[+OH] | 2.83                       |
| M(H <sub>2</sub> )4    | C <sub>26</sub> H <sub>37</sub> N <sub>6</sub> O <sub>4</sub> Si <sup>+</sup>  | 525.26401                       | 525.26305                                        | -1.82880                                     |  H <sup>+</sup><br>[+OH] | 2.53                       |



Formation of defluorinated metabolite of SiFA-H<sub>2</sub>Tz as its proposed geometric *E*- (M(H<sub>2</sub>)3) and *Z*-isomers (M(H<sub>2</sub>)4) incubated in mouse liver microsomes.

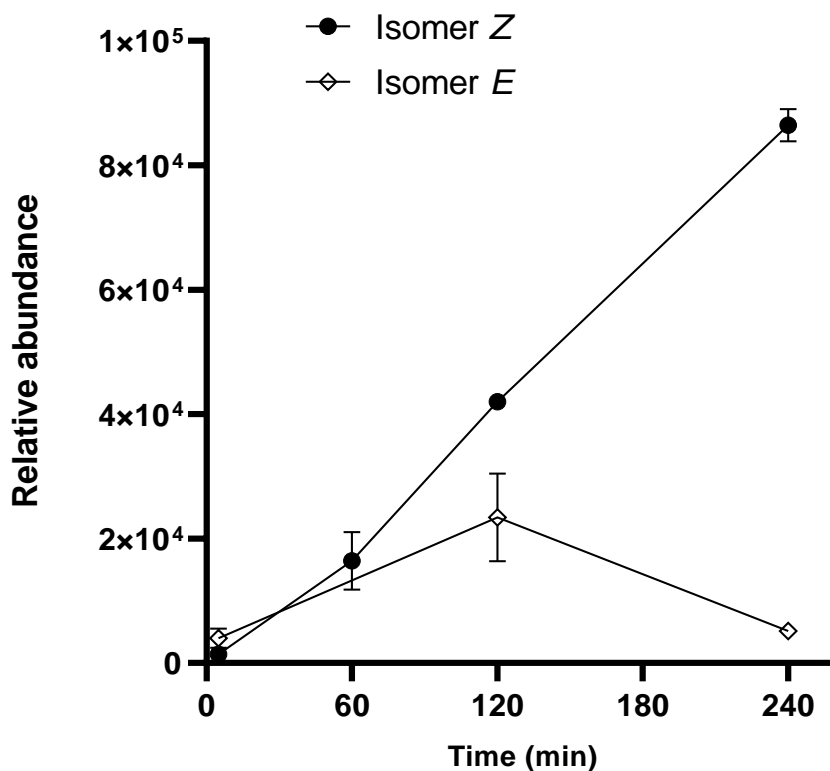

**Figure S6.** The formation of defluorinated metabolite of SiFA-H<sub>2</sub>Tz as its proposed geometric *E*- (M(H<sub>2</sub>)3) and *Z*-isomers (M(H<sub>2</sub>)4) (*m/z* 525.26401) incubated in mouse liver microsomes. The difference in peak areas indicated the *E*-isomer was metabolized further and the *Z*-isomer was more resistant to further biotransformation.

**Table S4.** Elemental compositions, theoretical masses, measured masses, mass differences, proposed structures and retention times of proposed phase II metabolites of SiFA–Tz.

| Compd.    | Formula [M + H] <sup>+</sup>                                                   | Theoretical mass ( <i>m/z</i> ) | Observed mass ( <i>m/z</i> )                     | Mass difference (ppm)                         | Proposed structure                                                                 | <i>T<sub>R</sub></i> (min) |
|-----------|--------------------------------------------------------------------------------|---------------------------------|--------------------------------------------------|-----------------------------------------------|------------------------------------------------------------------------------------|----------------------------|
| SiFA–Tz   | C <sub>26</sub> H <sub>34</sub> FN <sub>6</sub> O <sub>2</sub> Si <sup>+</sup> | 509.24911                       | 509.24905 ( <i>E</i> )<br>509.24900 ( <i>Z</i> ) | 0.01860 ( <i>E</i> )<br>-0.20865 ( <i>Z</i> ) | 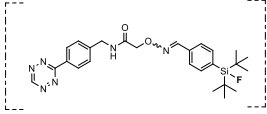 | 4.64<br>4.37               |
| <b>M6</b> | C <sub>32</sub> H <sub>42</sub> FN <sub>6</sub> O <sub>9</sub> Si <sup>+</sup> | 701.27611                       | 701.27497                                        | -1.62253                                      |  | 3.67                       |
| <b>M7</b> | C <sub>32</sub> H <sub>42</sub> FN <sub>6</sub> O <sub>9</sub> Si <sup>+</sup> | 701.27611                       | 701.27492                                        | -1.69332                                      |  | 3.64                       |
| <b>M8</b> | C <sub>32</sub> H <sub>43</sub> N <sub>6</sub> O <sub>10</sub> Si <sup>+</sup> | 699.28044                       | 699.28054                                        | 0.13626                                       |  | 2.96                       |
| <b>M9</b> | C <sub>32</sub> H <sub>43</sub> N <sub>6</sub> O <sub>10</sub> Si <sup>+</sup> | 699.28044                       | 699.28039                                        | -0.07358                                      |  | 2.89                       |

**Table S5.** Elemental compositions, theoretical masses, measured masses, mass differences, proposed structures and retention times of proposed phase II metabolites of SiFA–H<sub>2</sub>Tz.

| Compd.                   | Formula [M + H] <sup>+</sup>                                                   | Theoretical mass ( <i>m/z</i> ) | Observed mass ( <i>m/z</i> )                     | Mass difference (ppm)                        | Proposed structure                                                                   | <i>T<sub>R</sub></i> (min) |
|--------------------------|--------------------------------------------------------------------------------|---------------------------------|--------------------------------------------------|----------------------------------------------|--------------------------------------------------------------------------------------|----------------------------|
| SiFA–H <sub>2</sub> Tz   | C <sub>26</sub> H <sub>36</sub> FN <sub>6</sub> O <sub>2</sub> Si <sup>+</sup> | 511.26476                       | 511.26478 ( <i>E</i> )<br>511.26478 ( <i>Z</i> ) | 0.04872 ( <i>E</i> )<br>0.04429 ( <i>Z</i> ) | 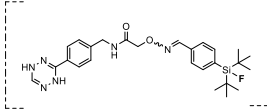 | 4.37 /<br>4.24             |
| <b>M(H<sub>2</sub>)5</b> | C <sub>32</sub> H <sub>44</sub> FN <sub>6</sub> O <sub>9</sub> Si <sup>+</sup> | 703.29176                       | 703.29099                                        | -1.08514                                     |  | 2.73                       |
| <b>M(H<sub>2</sub>)6</b> | C <sub>32</sub> H <sub>44</sub> FN <sub>6</sub> O <sub>9</sub> Si <sup>+</sup> | 703.29176                       | 703.29058                                        | -1.68090                                     |  | 2.50                       |
| <b>M(H<sub>2</sub>)7</b> | C <sub>32</sub> H <sub>45</sub> N <sub>6</sub> O <sub>10</sub> Si <sup>+</sup> | 701.29609                       | 701.29471                                        | -1.97998                                     |  | 2.34                       |
| <b>M(H<sub>2</sub>)8</b> | C <sub>32</sub> H <sub>45</sub> N <sub>6</sub> O <sub>10</sub> Si <sup>+</sup> | 701.29609                       | 701.29540                                        | -0.98842                                     |  | 2.20                       |

Formation of *o*-glucuronide conjugate metabolites M6 and M8 in MLMs.

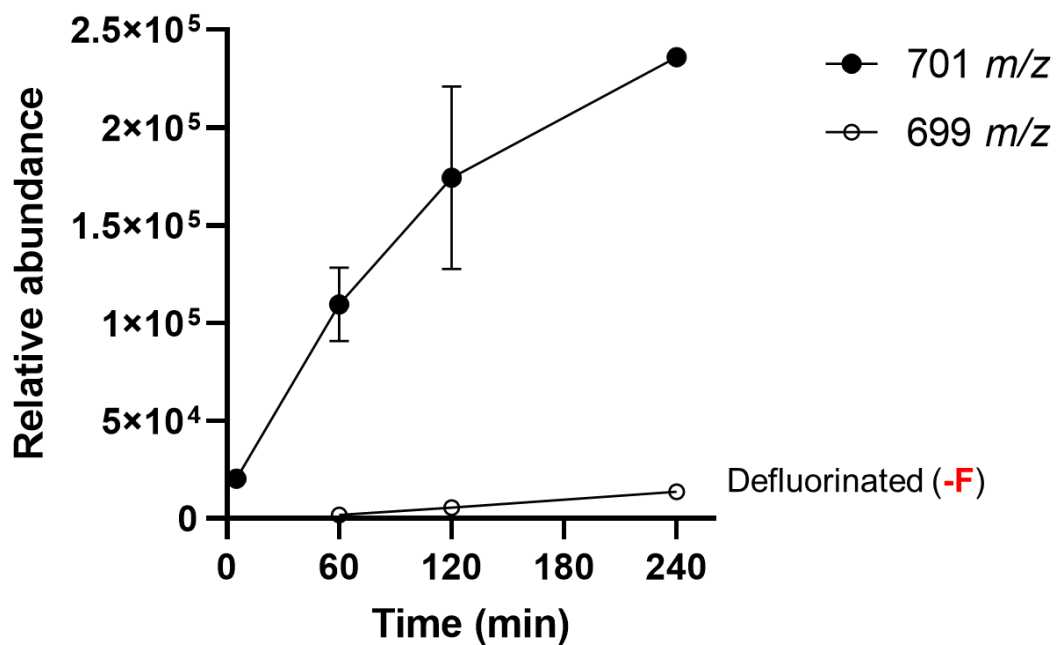

**Figure S7.** Formation of *o*-glucuronide conjugate metabolites **M6** (*m/z* 701) and defluorinated **M8** (*m/z* 699) of SiFA-H<sub>2</sub>Tz in mouse liver microsomes.

Formation of proposed *o*-glucuronide conjugate metabolites **M(H<sub>2</sub>)5** and defluorinated **M(H<sub>2</sub>)7**.

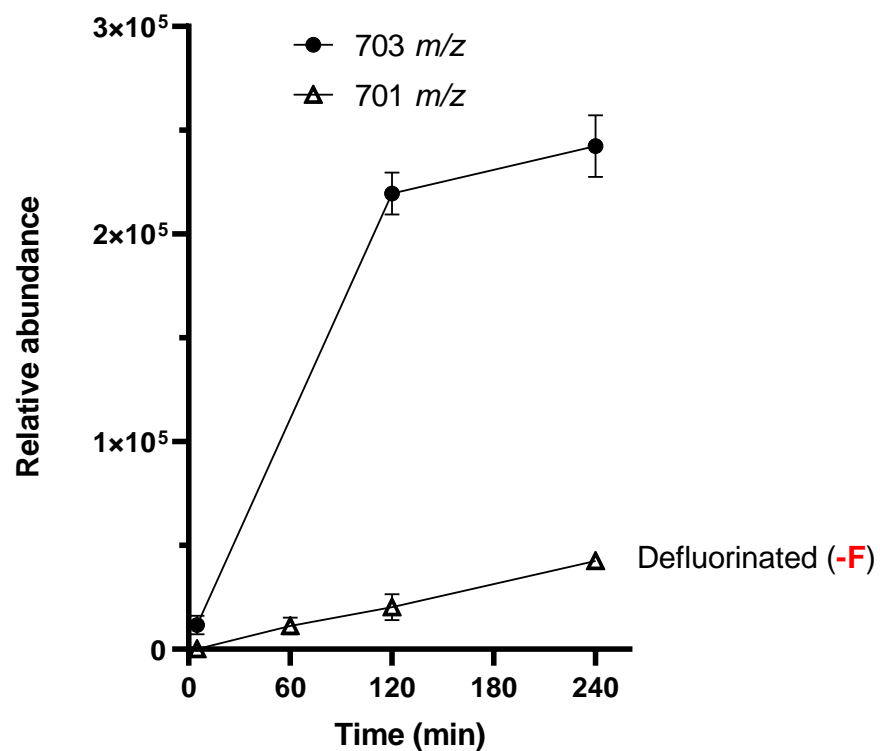

**Figure S8.** Formation of *o*-glucuronide conjugate metabolites **M(H<sub>2</sub>)5** (*m/z* 703) and defluorinated **M(H<sub>2</sub>)7** (*m/z* 701) of SiFA-H<sub>2</sub>Tz in mouse liver microsomes.

**Table S6.** Theoretical masses, retention times, biotransformations and major fragments of proposed metabolites of SiFA–Tz and SiFA–H<sub>2</sub>Tz detected in *in vitro* samples.

| Compd. ID                           | T <sub>R</sub> | Biotransformation                                                  | Observed mass ( <i>m/z</i> ) | Ms <sup>n</sup> fragments ( <i>m/z</i> )                                                                                |
|-------------------------------------|----------------|--------------------------------------------------------------------|------------------------------|-------------------------------------------------------------------------------------------------------------------------|
| ( <i>E</i> )-SiFA–Tz                | 4.64           | (Parent)                                                           | 509.24905                    | 491.23733, 454.23086, 351.18915, 322.16241, 264.15716 (75%), 246.09795 (93%), 191.08101, 171.06609, 116.04928, 88.03925 |
| ( <i>Z</i> )-SiFA–Tz                | 4.37           | (Parent)                                                           | 509.24900                    | 454.23352, 351.19031, 264.15821 (63%), 246.09920 (79%), 191.08200, 171.06696, 116.04928                                 |
| <b>M1</b>                           | 3.68           | Hydroxylation                                                      | 525.24329                    | 451.17084, 396.15384, 354.10693, 246.09856, 191.08153, 171.06651                                                        |
| <b>M2</b>                           | 3.64           | Hydroxylation                                                      | 525.24323                    | 451.17072, 396.15369, 246.09857, 191.08159, 116.04955                                                                   |
| <b>M3</b>                           | 2.58           | Hydroxylation                                                      | 523.24753                    | 505.35385, 451.19080, 421.18030, 378.17447, 173.08218                                                                   |
| <b>M4</b>                           | 2.55           | Dihydroxylation, oxidative defluorination                          | 539.24237                    | 507.76541, 489.86511, 389.63953, 245.94293, 173.09607                                                                   |
| <b>M5</b>                           | 2.27           | Dihydroxylation, oxidative defluorination                          | 539.24240                    | 521.24384, 448.38474, 418.03268, 332.88428, 353.26602, 263.93127, 191.16951, 173.04382                                  |
| <b>M6</b>                           | 3.67           | Hydroxylation, <i>o</i> -glucuronidation                           | 701.27497                    | 451.16956, 396.15280, 354.10587, 246.09789, 191.08148, 171.06653, 116.04959                                             |
| <b>M7</b>                           | 3.64           | Hydroxylation, <i>o</i> -glucuronidation                           | 701.27492                    | 471.72101, 396.15372, 354.19681, 246.09866, 171.06660, 116.04957                                                        |
| <b>M8</b>                           | 2.96           | Hydroxylation, oxidative defluorination, <i>o</i> -glucuronidation | 699.28054                    | 505.63568, 487.14490, 449.18030, 394.15790, 376.14758                                                                   |
| <b>M9</b>                           | 2.89           | Hydroxylation, oxidative defluorination, <i>o</i> -glucuronidation | 699.28039                    | 505.24277, 449.18033, 394.15805, 376.16394                                                                              |
| <hr/>                               |                |                                                                    |                              |                                                                                                                         |
| ( <i>E</i> )-SiFA–H <sub>2</sub> Tz | 4.36           | (Parent)                                                           | 511.26478                    | 454.23126, 339.18918, 334.19772, 264.15741, 248.11380, 191.08115, 173.08185, 116.054941                                 |
| ( <i>Z</i> )-SiFA–H <sub>2</sub> Tz | 4.24           | (Parent)                                                           | 511.26478                    | 334.19742, 264.15717, 248.11362, 173.08174                                                                              |
| <b>M(H<sub>2</sub>)1</b>            | 3.86           | Hydroxylation                                                      | 527.25877                    | 509.24899, 453.18646, 424.17252, 396.15378, 351.15625, 248.11424, 173.08220, 118.06523                                  |
| <b>M(H<sub>2</sub>)2</b>            | 3.63           | Hydroxylation                                                      | 527.25873                    | 509.24936, 453.18643, 423.17606, 380.17004, 248.84013                                                                   |
| <b>M(H<sub>2</sub>)3</b>            | 2.83           | Hydroxylation, oxidative defluorination                            | 525.26303                    | 451.19073, 422.17967, 394.15814, 323.15738, 173.08214                                                                   |
| <b>M(H<sub>2</sub>)4</b>            | 2.53           | Hydroxylation, oxidative defluorination                            | 525.26305                    | 507.36029, 451.19086, 421.18027, 378.17444, 351.16339, 248.11417, 173.08214                                             |
| <b>M(H<sub>2</sub>)5</b>            | 2.73           | Hydroxylation, <i>o</i> -glucuronidation                           | 703.29099                    | 527.25964, 509.24911, 453.18649, 424.17252, 396.15381, 248.11435, 173.08217, 118.06525                                  |
| <b>M(H<sub>2</sub>)6</b>            | 2.50           | Hydroxylation, <i>o</i> -glucuronidation                           | 703.29058                    | 527.25909, 509.24902, 453.18649, 423.17590, 396.27402, 380.17004, 173.08212                                             |
| <b>M(H<sub>2</sub>)7</b>            | 2.34           | Hydroxylation, oxidative defluorination, <i>o</i> -glucuronidation | 701.29471                    | 525.24188, 507.23177, 451.16901, 396.15213, 394.15677, 352.11020, 248.49008, 173.08167                                  |
| <b>M(H<sub>2</sub>)8</b>            | 2.20           | Hydroxylation, oxidative defluorination, <i>o</i> -glucuronidation | 701.29540                    | 525.24243, 507.23135, 451.16916, 396.15231, 349.13953, 248.11385, 173.08191                                             |

## MS/HRMS spectrum and fragments of proposed phase I and phase II metabolites of SiFA-H<sub>2</sub>Tz.

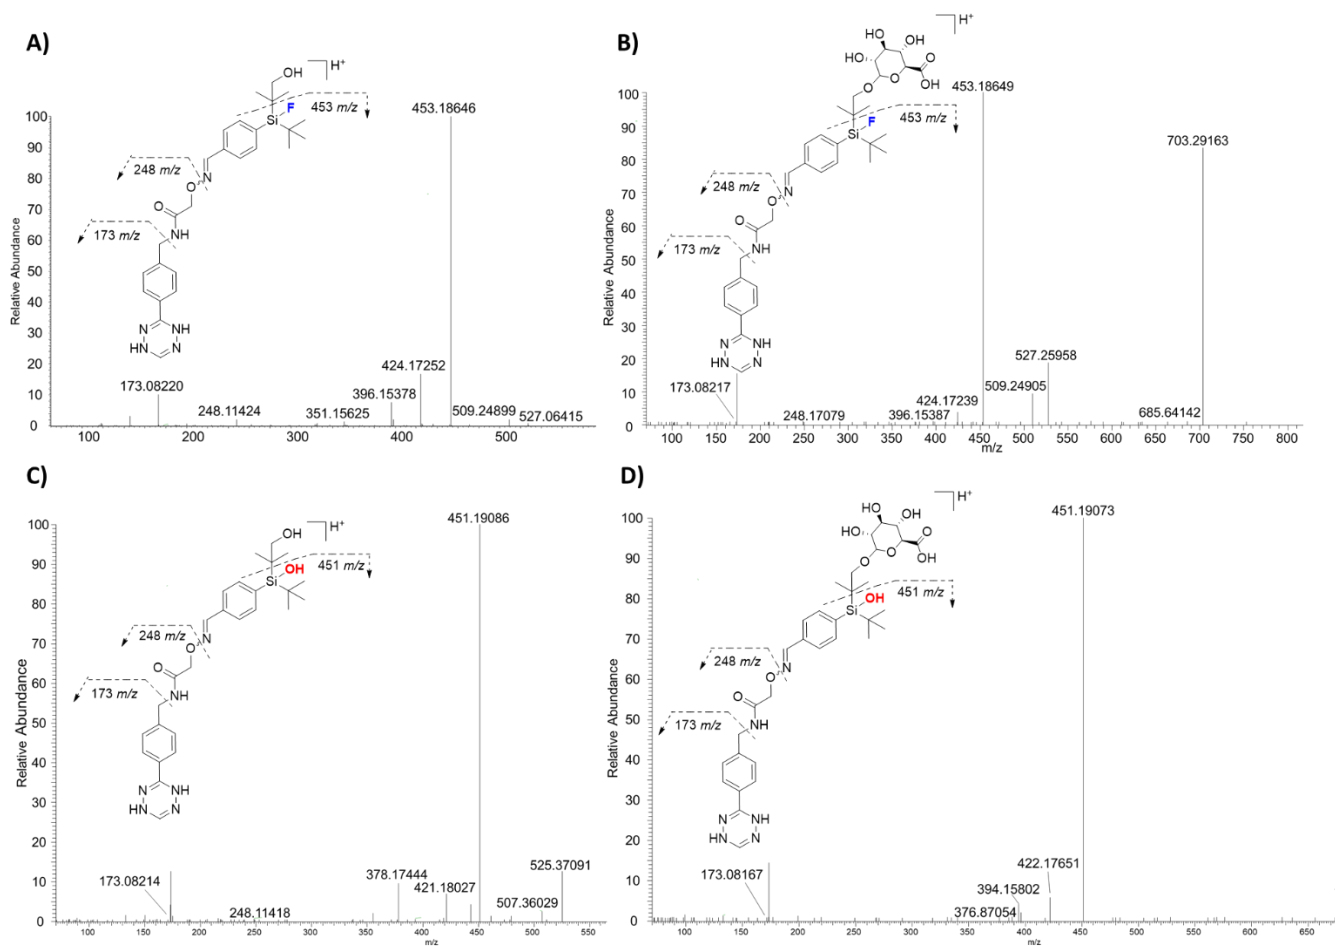

**Figure S9.** MS<sup>2</sup>-fragmentation patterns for proposed metabolites **M(H<sub>2</sub>)1**, **M(H<sub>2</sub>)3**, **M(H<sub>2</sub>)5**, and **M(H<sub>2</sub>)7** of SiFA-H<sub>2</sub>Tz demonstrating similar fragmentation patterns. (A; **M(H<sub>2</sub>)1** 527.2596 using HCD 20%, B; **M(H<sub>2</sub>)5** 703.2197 using HCD 10%, C; **M(H<sub>2</sub>)3** 525.2640 using HCD 25%, D; **M(H<sub>2</sub>)7** 701.2960 using HCD 20%). Fragments at *m/z* 248 and at *m/z* 173 indicated compound SiFA-H<sub>2</sub>Tz was subject to no metabolism at tetrazine ring. The *tert*-butyl group adjacent to silicon was apparently hydroxylated and subsequently *o*-glucuronidated. Fragments at *m/z* 507 and at *m/z* 509 from phase I metabolites **M(H<sub>2</sub>)3** and **M(H<sub>2</sub>)1** respectively, indicated the cleavage of water (-18 Da). In addition, the cleavage of the glucuronic acid from **M(H<sub>2</sub>)3** (*m/z* 703) was detected as a fragment with *m/z* 527. The fragments *m/z* 451 from **M(H<sub>2</sub>)3** and **M(H<sub>2</sub>)7** and *m/z* 453 from **M(H<sub>2</sub>)1** and **M(H<sub>2</sub>)5** were diagnostic fragments verifying the position of *o*-glucuronide at the *tert*-butyl group, by their simultaneous cleavage from the structure.

**Fragmentation pattern for proposed metabolite M(H<sub>2</sub>)5 (*m/z* 703) using HCD 30%**

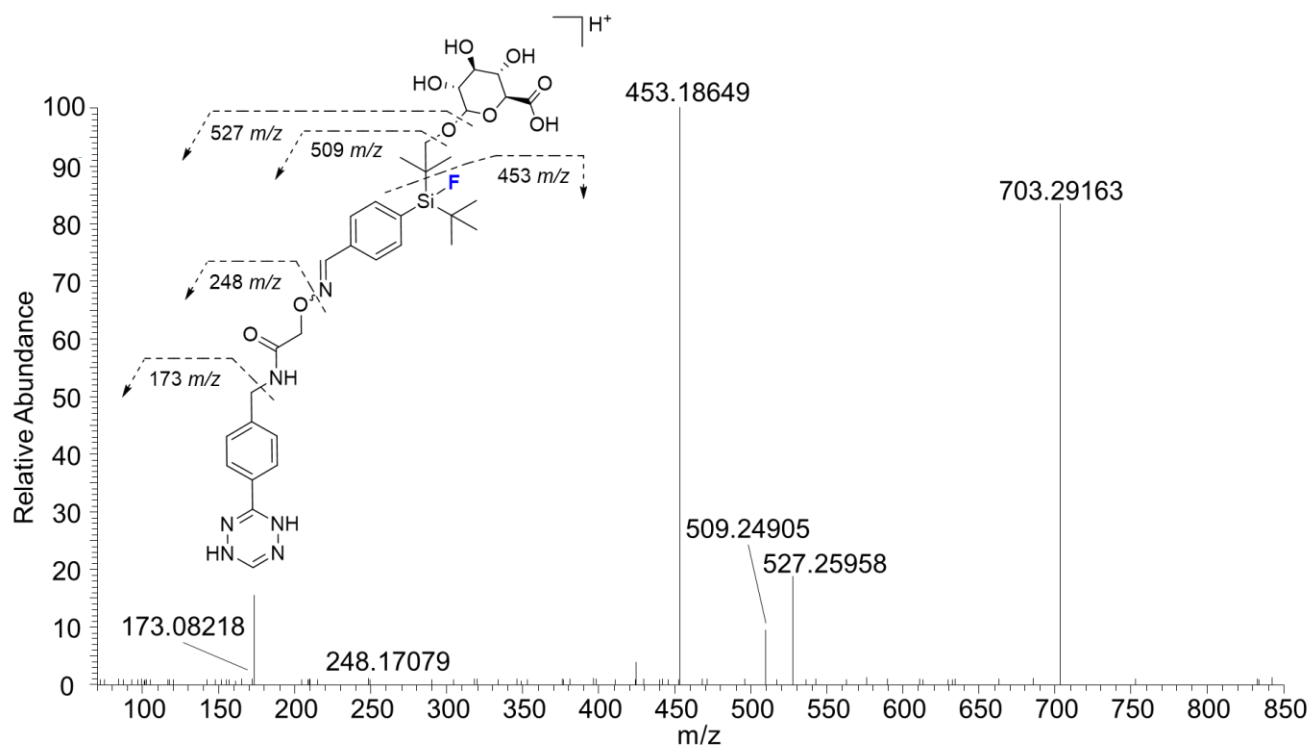

**Figure S10.** Fragments formed using MS/HRMS for proposed metabolite **M(H<sub>2</sub>)5** (*m/z* 703) using HCD 30% of SiFA–H<sub>2</sub>Tz demonstrating characteristic fragments at *m/z* 527, *m/z* 509, *m/z* 453, *m/z* 248 and *m/z* 173.

**MS/MS/HRMS (MS<sup>3</sup>)–spectrum and fragmentation pattern of proposed metabolite M6 of SiFA-Tz.**

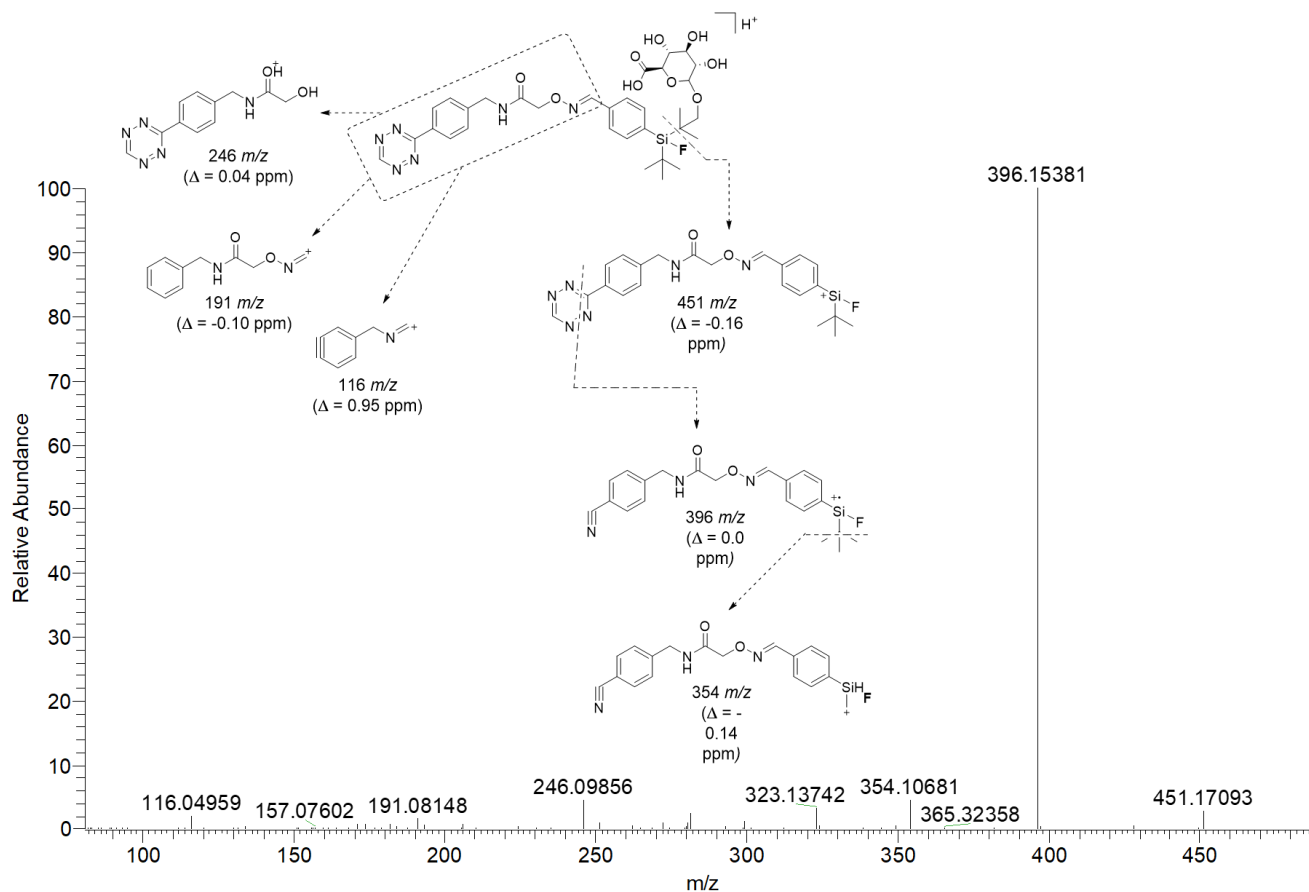

**Figure S11.** Fragmentation pattern of proposed metabolite **M6** ( $m/z$  701.27497,  $t_R$  = 3.67 min) at  $m/z$  451 using HCD 25% ( $\Delta$ ; mass difference in ppm).



**Extracted ion chromatograms of proposed hydroxylated and *o*-glucuronidated metabolites **M(H<sub>2</sub>)<sub>3</sub>** and its defluorinated analogue **M(H<sub>2</sub>)<sub>4</sub>**.**

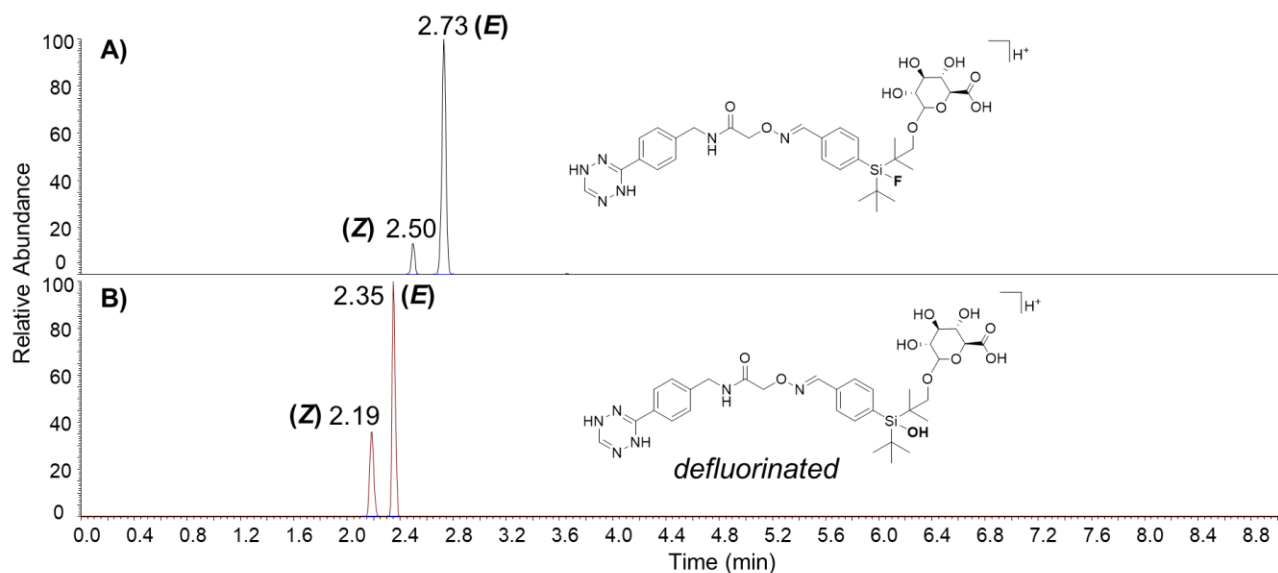

**Figure S12.** Proposed metabolites of SiFA-H<sub>2</sub>Tz. EICs of hydroxylated and *o*-glucuronidated metabolite **A) M(H<sub>2</sub>)<sub>3</sub>** (*m/z* 703) and **B) its defluorinated analogue M(H<sub>2</sub>)<sub>4</sub>** (*m/z* 701). The difference in the retention time between the two metabolites **M(H<sub>2</sub>)<sub>3</sub>** and **M(H<sub>2</sub>)<sub>4</sub>** is due to the lipophilicity difference of OH and F. Additionally the pairs of peaks indicate presence of analogous (*E/Z*)-isomers. Both *E*- and *Z*-isomers (**M(H<sub>2</sub>)<sub>4</sub>** *E*-isomer 85 ± 2%, **M(H<sub>2</sub>)<sub>3</sub>** *E*-isomer 82 ± 1%) were detected in phase II *in vitro* samples.
